# Supplementary material for: Rose bengal-integrated electrospun polyacrylonitrile nanofibers for photodynamic inactivation of bacteria
Source: Royal Society of Chemistry journal article supplement (doi:10.1039/d2va00166g), 2022-01-01
Supplement: d2va00166g1.pdf [file d2va00166g1.pdf]

## Supporting Information

### Rose Bengal-Integrated Electrospun Polyacrylonitrile Nanofibers for Photodynamic Inactivation of Bacteria

Xiuli Dong, Dionne G. Mitchell, Martha Y. Garcia Cervantes, Basant Chitara, Liju Yang, and Fei Yan

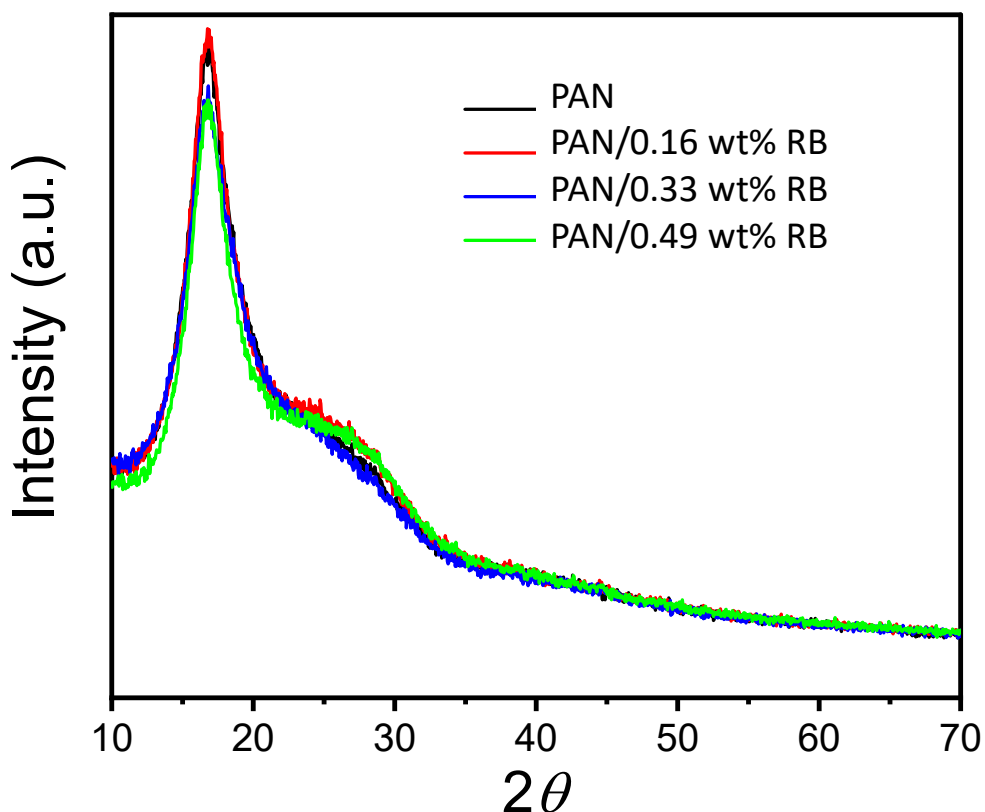

**Fig. S1.** From top to bottom: XRD patterns of electrospun PAN nanofibers alone, and electrospun PAN nanofibers embedded with 0.16 wt%, 0.33 wt%, and 0.49 wt% of RB. The XRD pattern for electrospun PAN nanofibers did not show any phase changes after the incorporation of different amounts of RB.
